# Supplementary material
Source: PubMed Central journal article supplement (PMC5714449)
Supplement: 1301FileS1.pdf [file 1301FileS1.pdf]

## 1 Supplementary Figures

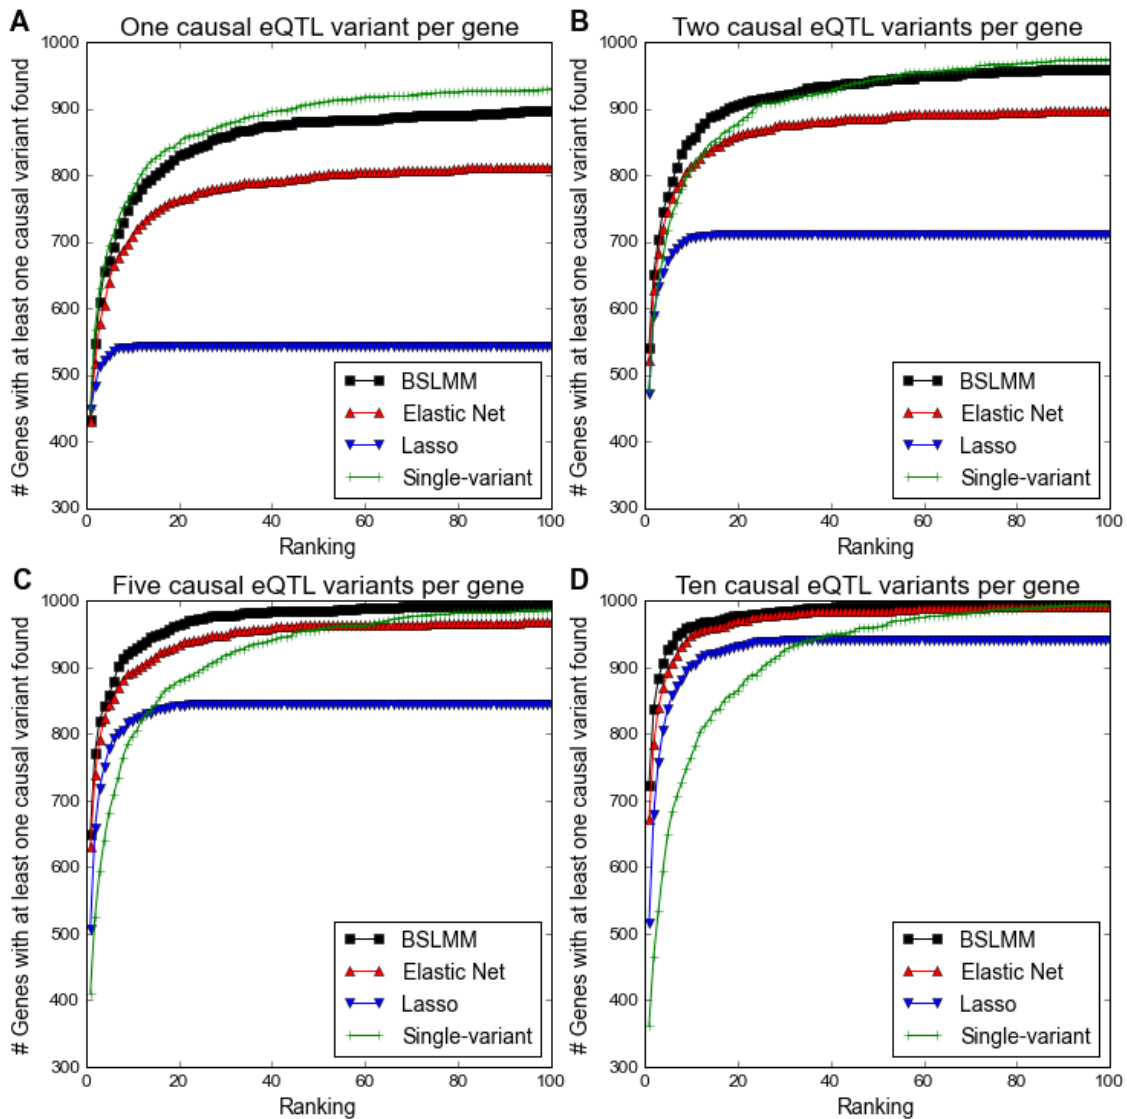

2  
 3 **Figure S1. The number of genes with at least one causal eQTL variant found from**  
 4 **the simulation data of 503 samples with 60% heritability.** The x-axis shows the  
 5 ranking cutoff and the y-axis shows the number of genes with at least one causal eQTL  
 6 variant found at the ranking cutoff. (A) One causal eQTL variant per gene. (B) Two  
 7 causal eQTL variants per gene. (C) Five causal eQTL variants per gene. (D) Ten causal  
 8 eQTL variants per gene.

9

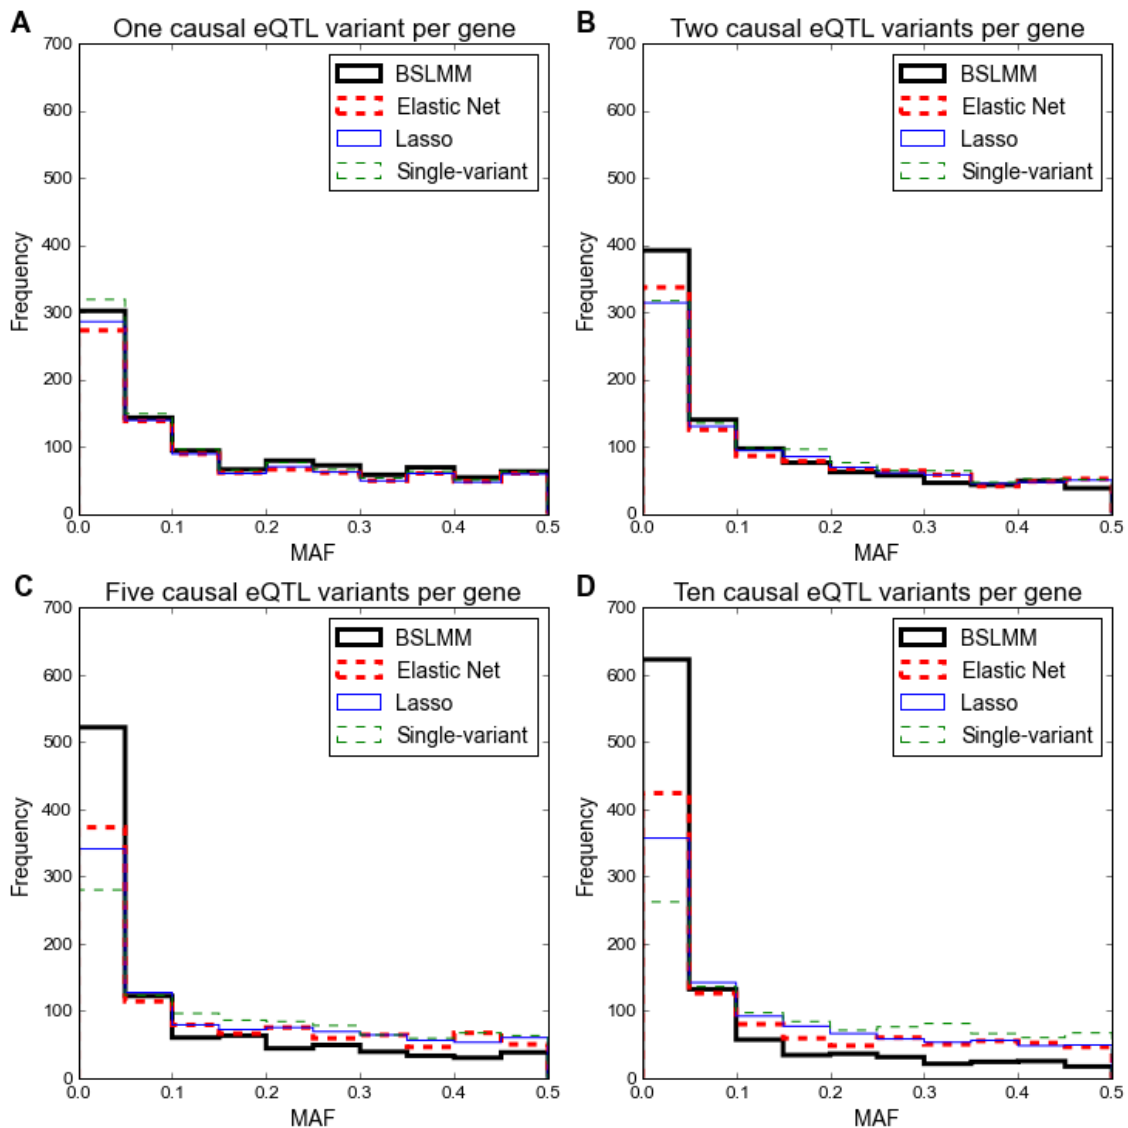

1

2

3 **Figure S2. Minor allele frequency of eQTL SNPs identified with each method.**

4 The x-axis shows minor allele frequency (MAF) and the y-axis shows the number of top

5 eQTL SNPs within the specified MAF bin identified by each method. (A) One causal

6 eQTL variant per gene. (B) Two causal eQTL variants per gene. (C) Five causal eQTL

7 variants per gene. (D) Ten causal eQTL variants per gene.

8

1

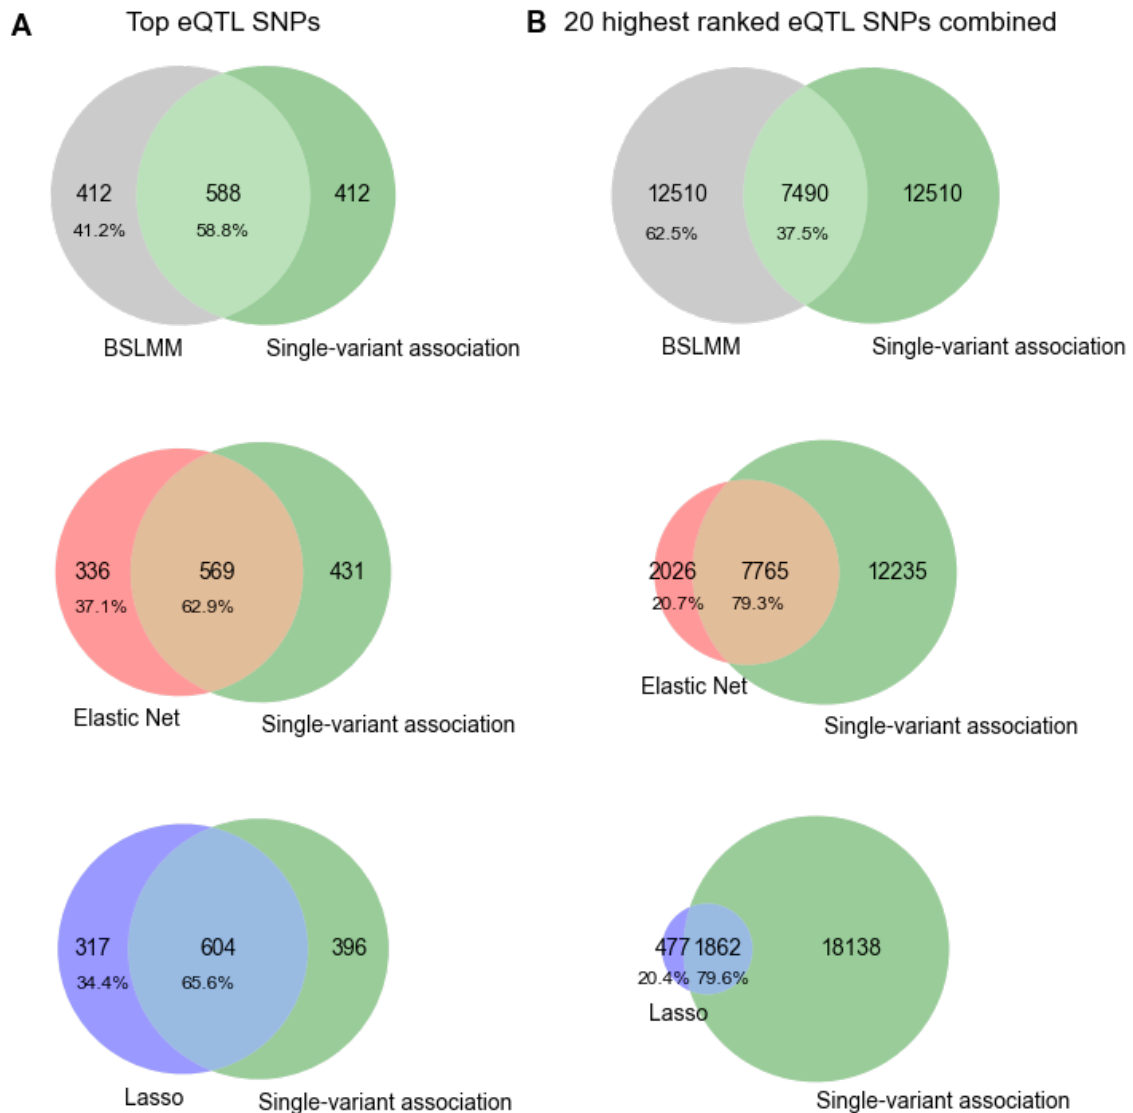

2

3 **Figure S3. Overlap of the identified eQTL variants from the simulation data of 503**4 **samples with 60% heritability and one causal variant per gene. (A) Overlap of the**5 **top eQTL SNPs between each sparse polygenic model (top: BSLMM, middle: Elastic**6 **Net, bottom: Lasso) and single-variant association analysis. (B) Overlap of the 20**7 **highest ranked eQTL SNPs combined between each sparse polygenic model (top:**8 **BSLMM, middle: Elastic Net, bottom: Lasso) and single-variant association analysis.**9 **The percentages shown indicate the fraction of eQTL SNPs identified by the sparse**10 **polygenic model that overlap with those identified by single-variant association**11 **analysis.**

12

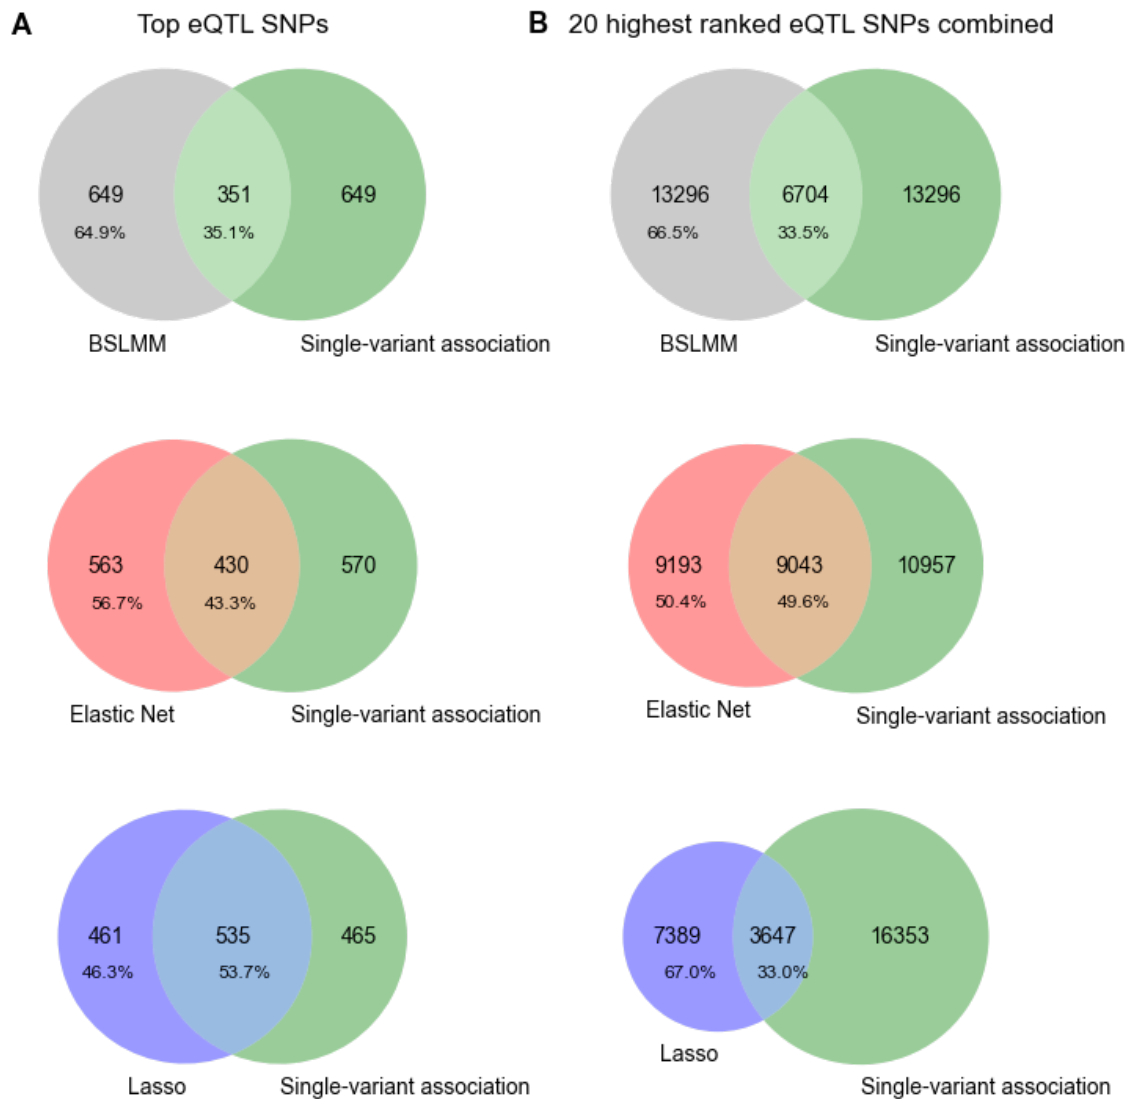

1  
 2 **Figure S4. Overlap of the identified eQTL variants from the simulation data of 503**  
 3 **samples with 60% heritability and five causal variants per gene.** (A) Overlap of the  
 4 top eQTL SNPs between each sparse polygenic model (top: BSLMM, middle: Elastic  
 5 Net, bottom: Lasso) and single-variant association analysis. (B) Overlap of the 20  
 6 highest ranked eQTL SNPs combined between each sparse polygenic model (top:  
 7 BSLMM, middle: Elastic Net, bottom: Lasso) and single-variant association analysis.  
 8 The percentages shown indicate the fraction of eQTL SNPs identified by the sparse  
 9 polygenic model that overlap with those identified by single-variant association  
 10 analysis.

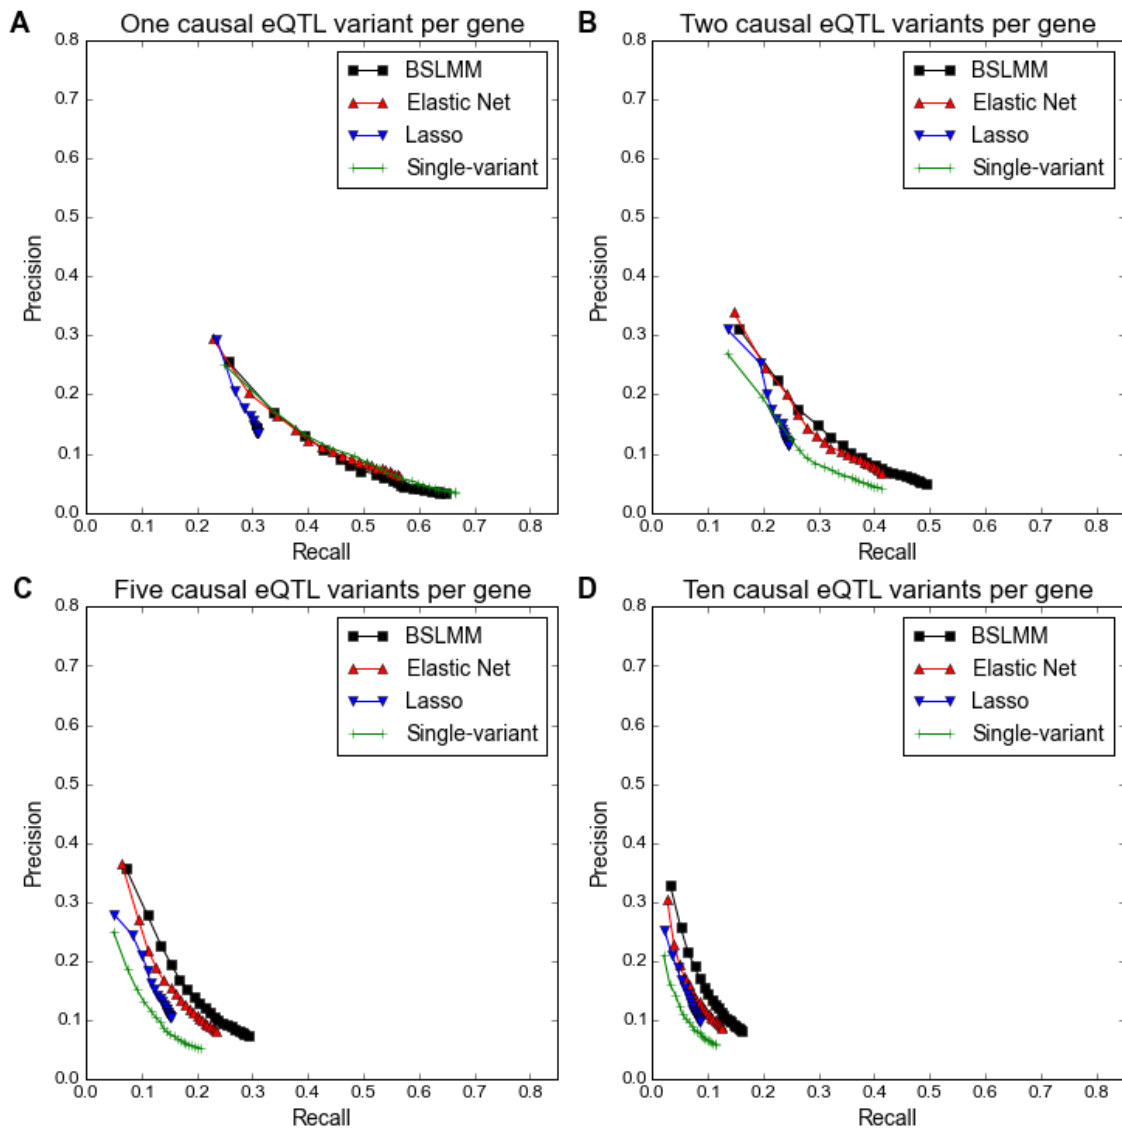

1

2 **Figure S5. Prediction performance for identifying causal eQTL variants from the**3 **simulation data of 100 samples with 60% heritability.** The x-axis shows recall and

4 the y-axis shows precision for the 20 highest ranked SNPs of 1,000 randomly selected

5 genes. (A) One causal eQTL variant per gene. (B) Two causal eQTL variants per gene.

6 (C) Five causal eQTL variants per gene. (D) Ten causal eQTL variants per gene.

7

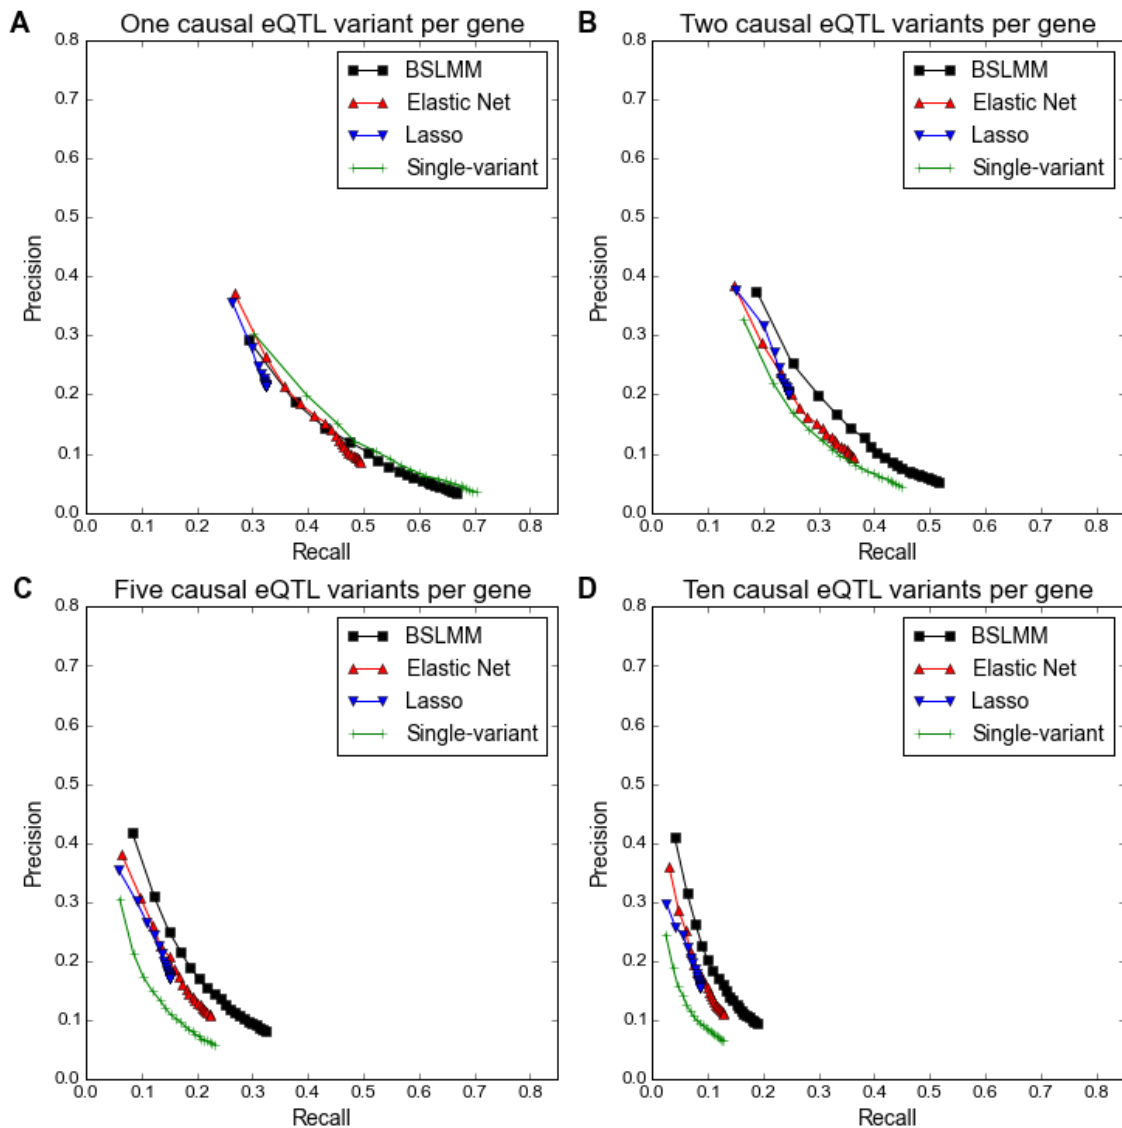

1

2 **Figure S6. Prediction performance for identifying causal eQTL variants from the**  
 3 **simulation data of 503 samples with 20% heritability.** The x-axis shows recall and  
 4 the y-axis shows precision for the 20 highest ranked SNPs of 1,000 randomly selected  
 5 genes. (A) One causal eQTL variant per gene. (B) Two causal eQTL variants per gene.  
 6 (C) Five causal eQTL variants per gene. (D) Ten causal eQTL variants per gene.

7

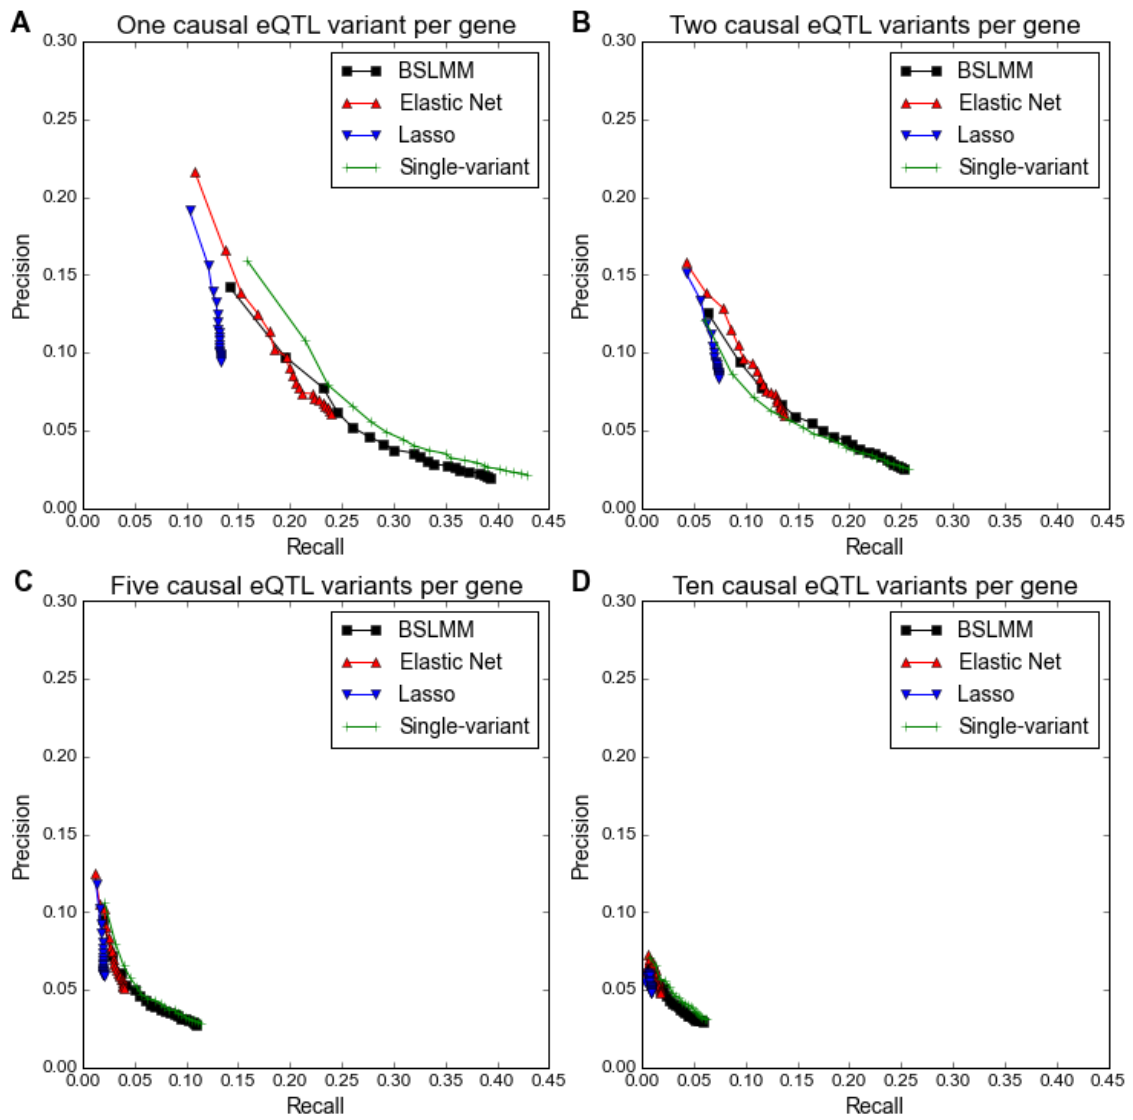

1

2 **Figure S7. Prediction performance for identifying causal eQTL variants from the**  
 3 **simulation data of 100 samples with 20% heritability.** The x-axis shows recall and  
 4 the y-axis shows precision for the 20 highest ranked SNPs of 1,000 randomly selected  
 5 genes. (A) One causal eQTL variant per gene. (B) Two causal eQTL variants per gene.  
 6 (C) Five causal eQTL variants per gene. (D) Ten causal eQTL variants per gene.

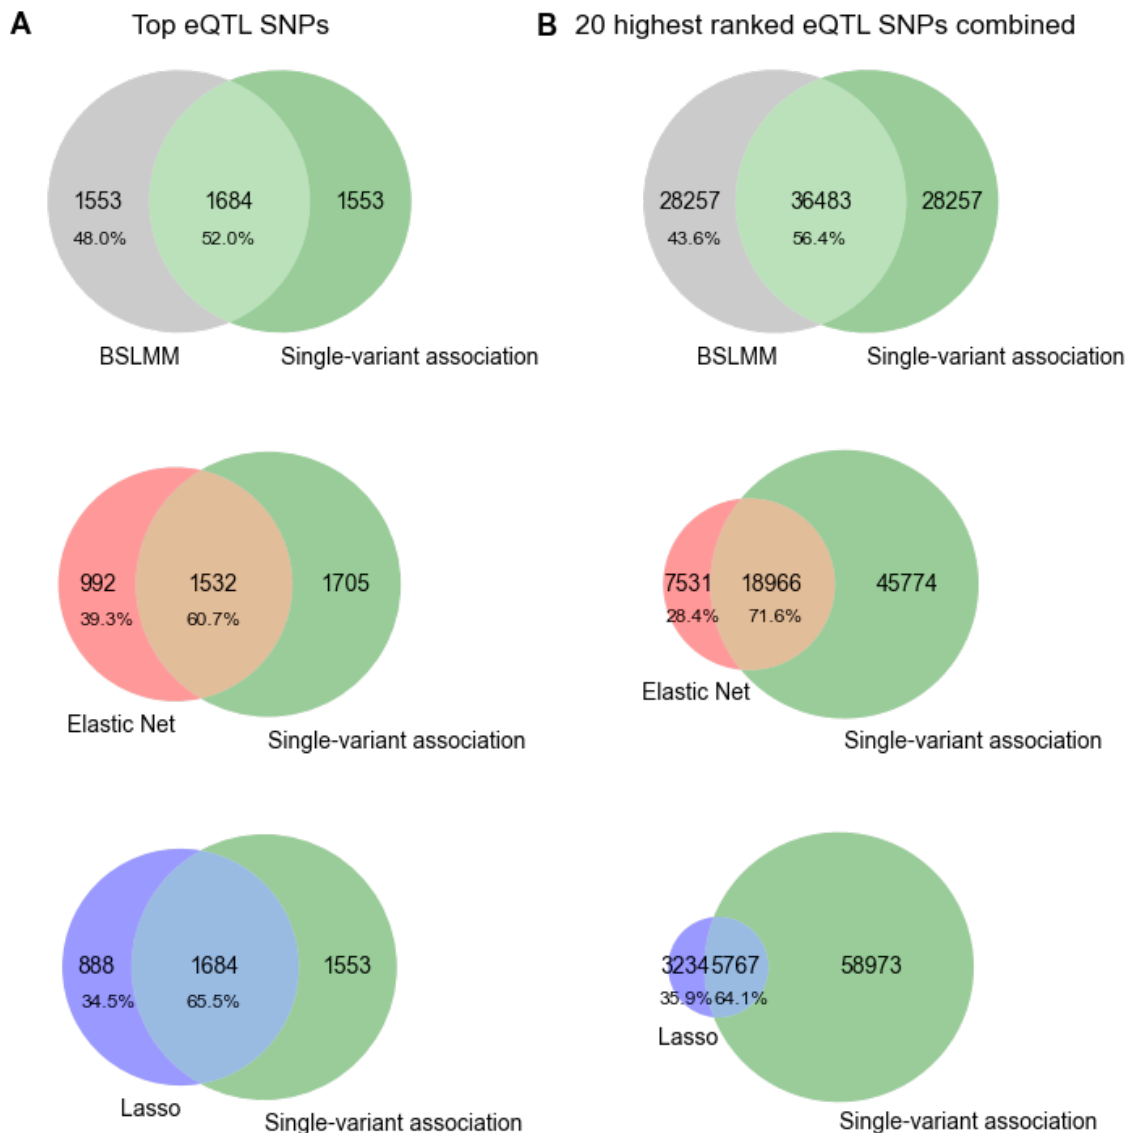

1  
2 **Figure S8. Overlap of eQTL variants of eGenes with one independent eQTL.** A)  
3 Overlap of the top eQTL SNPs between BSLMM and single-variant association  
4 analysis (top), Elastic Net and single-variant association analysis (middle), and Lasso  
5 and single-variant association analysis (bottom). (B) Overlap of the 20 highest ranked  
6 eQTL SNPs combined between BSLMM and single-variant association analysis (top),  
7 Elastic Net and single-variant association analysis (middle), and Lasso and single-  
8 variant association analysis (bottom). The percentages shown indicate the fraction of  
9 eQTL SNPs identified by the sparse polygenic model that overlap with those identified  
10 by single-variant association analysis.

11

12



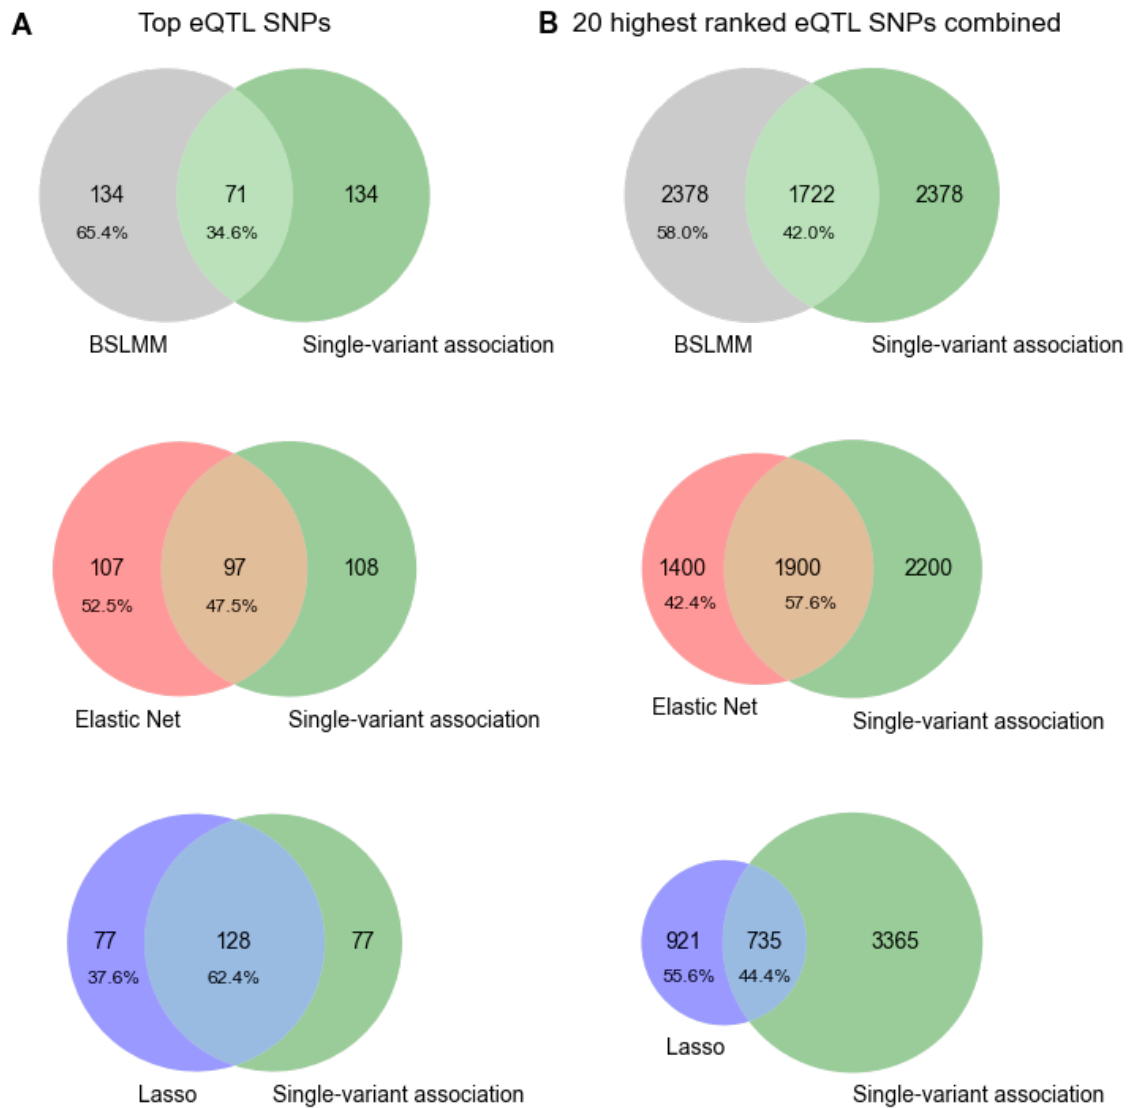

1  
2 **Figure S9. Overlap of eQTL variants of eGenes with more than one independent**  
3 **eQTLs.** (A) Overlap of the top eQTL SNPs between BSLMM and single-variant  
4 association analysis (top), Elastic Net and single-variant association analysis (middle),  
5 and Lasso and single-variant association analysis (bottom). (B) Overlap of the 20  
6 highest eQTL SNPs combined between BSLMM and single-variant association analysis  
7 (top), Elastic Net and single-variant association analysis (middle), and Lasso and single-  
8 variant association analysis (bottom). The percentages shown indicate the fraction of  
9 eQTL SNPs identified by the sparse polygenic model that overlap with those identified  
10 by single-variant association analysis.

11

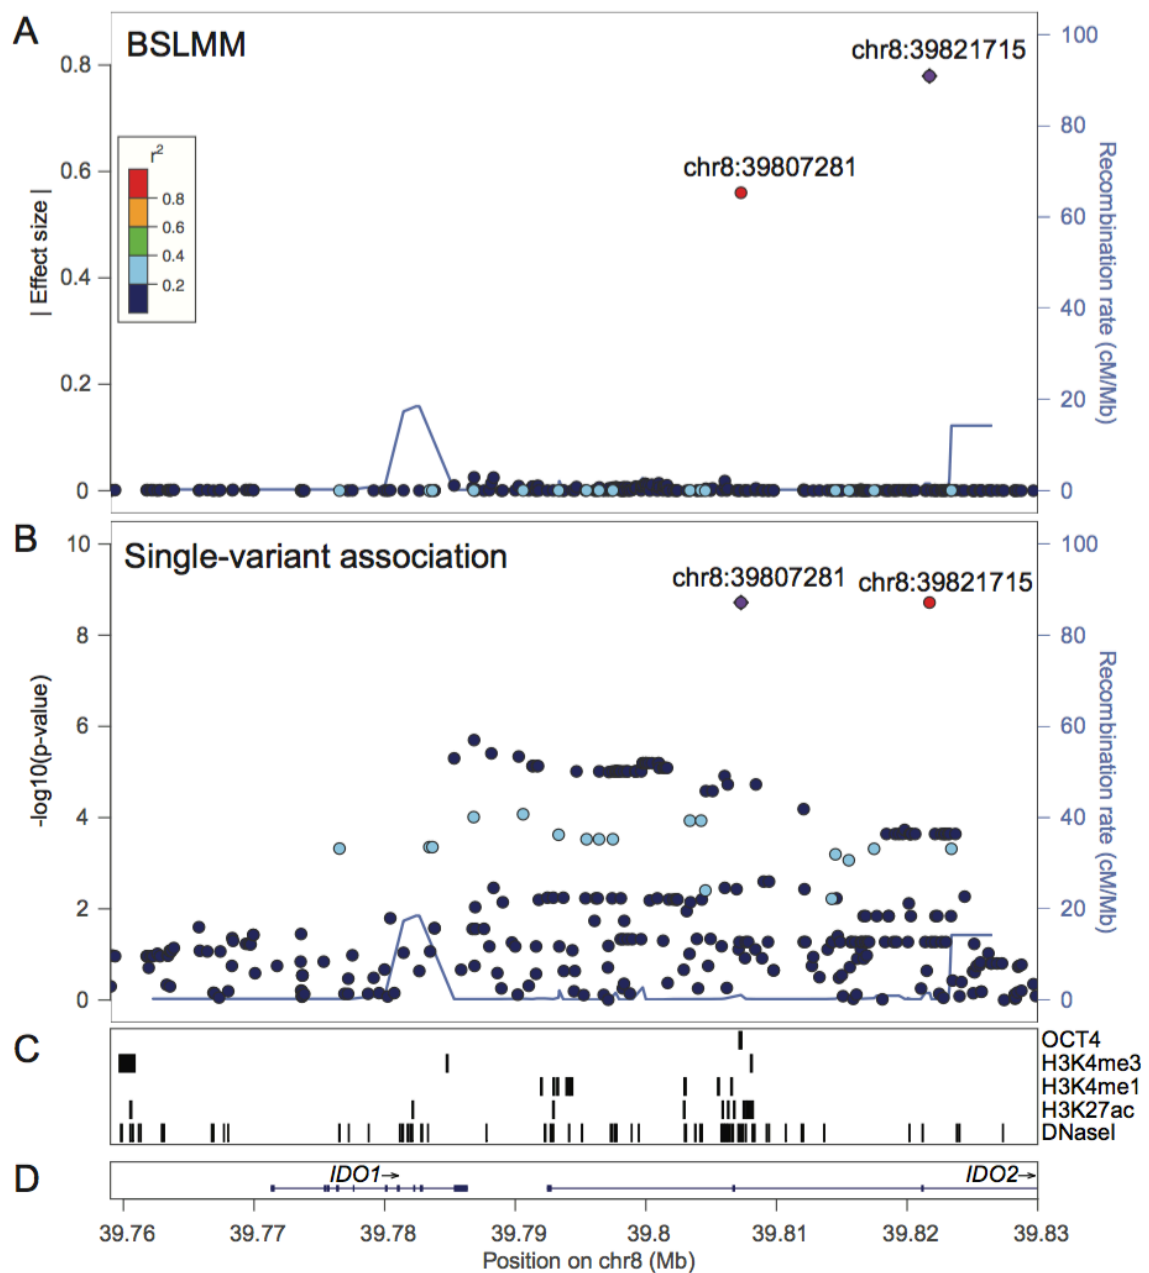

1  
2 **Figure S10. eQTL variants identified as associated with *IDO1* expression.** Variants  
3 are color-coded based on the strength of LD with the most highly associated eQTL  
4 (purple diamond). (A) BSLMM identified two eQTL SNPs as the most highly ranked  
5 eQTL variants, located on chr8:39807281 and chr8:39821715, which were also  
6 identified as significant by single-variant association analysis. (C) Genomic regions  
7 annotated with H1-hESC OCT4, iPSC histone marks (H3K4me3, H3K4me1, and  
8 H3K27ac), and iPSC DNase I hypersensitive sites (DHSs). (D) Genomic coordinates of  
9 *IDO1* and surrounding genes are based on hg19.
